# Supplementary material for: Rapid detection of toxic compounds in tobacco smoke condensates using high-resolution 1H-nuclear magnetic resonance spectroscopy
Source: Royal Society of Chemistry journal article supplement (doi:10.1039/c6ay00849f), 2016-01-01
Supplement: c6ay00849f1.pdf [file c6ay00849f1.pdf]

## **Electronic Supplementary Information**

### **Rapid detection of toxic compounds in tobacco smoke condensates using high-resolution $^1\text{H}$ -nuclear magnetic resonance spectroscopy**

Jana Ticha and Christopher Wright

British American Tobacco, Research and Development, Southampton UK

**This supplementary information includes details of the chemical standards used for NMR analysis; details of the NMR chemical shifts for the Hoffmann analytes; data mining for validation of the protocol; expanded views of the NRM spectra, and a comprehensive list of the relative recorded chemical shifts of HPHCs detected in different types of cigarette.**

**Supplementary Table S1.** List of chemical standards used for NMR

| Name                              | CAS         | Purity (%) | Supplier           |
|-----------------------------------|-------------|------------|--------------------|
| Acetaldehyde                      | 75-07-0     | 99.0%      |                    |
| Isoprene                          | 78-79-5     | 99.0%      |                    |
| Nicotine                          | 54-11-5     | 99.5%      |                    |
| Acetone                           | 67-64-1     | 99.9%      |                    |
| Acrolein                          | 107-02-8    | 95.0%      |                    |
| Toluene                           | 108-88-3    | 99.5%      |                    |
| Catechol                          | 120-80-9    | 99.5%      |                    |
| Hydroquinone                      | 123-31-9    | 99.0%      |                    |
| Formaldehyde                      | 50-00-0     | unknown    |                    |
| Acrylonitrile                     | 107-13-1    | 99.0%      |                    |
| Propionaldehyde                   | 123-38-6    | 98.5%      |                    |
| Crotonaldehyde                    | 123-73-9    | 98.5%      |                    |
| Butyraldehyde                     | 123-72-8    | 99.5%      |                    |
| Butanone (methyl ethyl ketone)    | 78-93-3     | 99.5%      |                    |
| Benzene                           | 71-43-2     | 99.5%      |                    |
| Pyridine                          | 110-86-1    | 99.5%      |                    |
| Phenol                            | 108-95-2    | 99.93%,    |                    |
| Styrene                           | 100-42-5    | 99.5%      |                    |
| <i>o</i> -Cresol (2-methylphenol) | 95-48-7     | 99.0%      |                    |
| <i>m</i> -Cresol (3-methylphenol) | 108-39-4    | 99.0%),    |                    |
| <i>p</i> -Cresol (4-methylphenol) | 106-44-5    | 99.0%      | LGC Standards (UK) |
| Resorcinol                        | 108-46-3    | 99.5%      |                    |
| Quinoline                         | 91-22-5     | 98.1%      |                    |
| <i>N</i> -nitrosornicotine        | 80508-23-2  | 98.5%      |                    |
| 1-Aminonaphthalene                | 134-32-7    | 99.5%      |                    |
| 2-Aminonaphthalene                | 91-59-8     | 99.5%      |                    |
| 3-Aminobiphenyl                   | 2243-47-2   | 99.5%      |                    |
| <i>N</i> -Nitrosoanatabine        | 887407-16-1 | 98.0%      |                    |
| <i>N</i> -Nitrosoanabasine        | 37620-20-5  | 98.0%      |                    |
| <i>N</i> -Nitrosornicotine ketone | 64091-91-4  | 98.0%      |                    |
| Benzo(a)pyrene                    | 50-32-8     | 99.6%      |                    |
| 4-aminobiphenyl                   | 92-67-1     | 99.5%      |                    |
| Acetamide                         | 60-35-5     | 99%        |                    |
| Anabasine                         | 13078-04-1  | 97%        |                    |
| <i>o</i> -Anisidine               | 90-04-0     | 99%        |                    |
| Pyrrolidine                       | 123-75-1    | 99.5%      |                    |
| <i>N</i> -Nitrosopyrrolidine      | 930-55-2    | 99.6%      |                    |
| Vinylacetate                      | 108-05-4    | 99%        |                    |
| Nitrobenzene                      | 98-95-3     | 99.9%      |                    |
| <i>o</i> -Toluidine               | 95-53-4     | 99%        |                    |
| 2-Nitropropane                    | 79-46-9     | 98.5%      |                    |
| <i>N</i> -Nitrosodiethanolamine   | 1116-54-7   | 99.9%      |                    |
| <i>N</i> -Nitrosopiperidine       | 100-75-4    | 99.9%      |                    |

| Name                                                                          | CAS        | Purity (%)   | Supplier                                              |
|-------------------------------------------------------------------------------|------------|--------------|-------------------------------------------------------|
| Chrysene                                                                      | 218-01-9   | 98.7%        |                                                       |
| 5-Methyl-chrysene                                                             | 3697-24-3  | 98.7%        |                                                       |
| Benzo(b)fluoranthene                                                          | 205-99-2   | 99.8%        |                                                       |
| Dibenzo(a,h)pyrene                                                            | 189-64-0   | 98%          |                                                       |
| N-Nitrosomethylethylamine                                                     | 10595-95-6 | 99.5%        |                                                       |
| Acrylamide                                                                    | 110-26-9   | 99.9%        | LGC Standards (UK)                                    |
| Benzo(a)anthracene                                                            | 56-55-3    | 99.9%        |                                                       |
| Indeno[1,2,3-c,d]pyrene                                                       | 193-39-5   | 99%          |                                                       |
| Naphthalene                                                                   | 91-20-3    | 99%          |                                                       |
| Propylene oxide                                                               | 75-56-9    | 99%          |                                                       |
| N-Nitrosodiethylamine                                                         | 55-18-5    | 99%          |                                                       |
| Dibenzo(a,e)pyrene                                                            | 192-65-4   | 99%          |                                                       |
| Deuterated methanol                                                           | 811-98-3   | 99.8% atom D | Cambridge Isotope Laboratories<br>(via LGC Standards) |
| 1,3-Butadiene dissolved in toluene<br>(20% w/w)                               | 106-99-0   | unknown      |                                                       |
| Ethylbenzene                                                                  | 100-41-4   | 99.8%        |                                                       |
| 2,5-Dimethylaniline                                                           | 95-78-3    | 99.0%        |                                                       |
| Acetamide                                                                     | 60-35-5    | 99.0%        |                                                       |
| o-Anisidine                                                                   | 90-04-0    | 99.0%        |                                                       |
| Benzo(k)fluoranthene                                                          | 207-08-9   | 99.0%        | Sigma Aldrich (UK)                                    |
| 2,3-Benzofuran                                                                | 271-89-6   | 99.0%        |                                                       |
| Coumarine                                                                     | 91-64-5    | 99.0%        |                                                       |
| Urethane                                                                      | 51-79-6    | 99.0%        |                                                       |
| Caffeic acid                                                                  | 331-39-5   | 98.0%        |                                                       |
| TSP (3-(trimethylsilyl)propionic-<br>2,2,3,3-d <sub>4</sub> acid sodium salt) | 24493-21-8 | 98 % atom D  |                                                       |

**Supplementary Table S2.** NMR chemical shifts of the Hoffman analytes detected in 3R4F cigarette TSC.

| Compound        | NMR detectable in TSC               | Chemical shifts in CD <sub>3</sub> OD                                                                                                                                                                                                                                                                                                                                                                                                                                                                                                                                                                                    | Chemical shifts observed in 3R4F TSC                                                                                                      | LOD (µg/cig.) <sup>1</sup> |
|-----------------|-------------------------------------|--------------------------------------------------------------------------------------------------------------------------------------------------------------------------------------------------------------------------------------------------------------------------------------------------------------------------------------------------------------------------------------------------------------------------------------------------------------------------------------------------------------------------------------------------------------------------------------------------------------------------|-------------------------------------------------------------------------------------------------------------------------------------------|----------------------------|
| Acetaldehyde    | yes                                 | 4.6885, 4.6782, 4.6679, 4.6576, 1.2585, 1.2481                                                                                                                                                                                                                                                                                                                                                                                                                                                                                                                                                                           | 4.6826, 4.6723, 4.6620, 4.6517, 1.2528, 1.2424                                                                                            | 4.08                       |
| Isoprene        | yes                                 | 6.482, 6.4606, 6.4471, 6.4257, 5.2021, 5.2009, 5.1997, 5.1671, 5.166, 5.1648, 5.0625, 5.0412, 4.9913, 4.9886, 4.9679, 4.9664, 4.9631                                                                                                                                                                                                                                                                                                                                                                                                                                                                                     | 6.4669, 6.4455, 6.4319, 6.4107, 5.1858, 5.1509, 5.0473, 5.026, 4.9759, 4.9527, 4.9515, 4.948, 4.9463                                      | 6.30                       |
| Nicotine        | yes                                 | 8.5025, 8.4991, 8.4483, 8.4453, 8.4386, 8.4355, 7.8705, 7.867, 7.8635, 7.8547, 7.8512, 7.8477, 7.4412, 7.4314, 7.4256, 7.4158, 2.4076, 2.389, 2.3712, 2.3526, 2.3087, 2.2982, 2.2931, 2.2898, 2.2831, 2.2793, 2.2736, 2.2676, 2.264, 2.2574, 2.254, 2.2488, 2.2383, 2.0113, 2.008, 2.0043, 1.9981, 1.9923, 1.9863, 1.9822, 1.9762, 1.9703, 1.9671, 1.9631, 1.9599, 1.9573, 1.9514, 1.941, 1.9347, 1.9304, 1.9232, 1.9181, 1.913, 1.911, 1.9044, 1.9, 1.8935, 1.8871, 1.8823, 1.876, 1.8744, 1.8239, 1.8125, 1.8052, 1.8017, 1.7988, 1.7939, 1.7903, 1.7871, 1.7831, 1.78, 1.7768, 1.7716, 1.7684, 1.7654, 1.758, 1.7463. | 8.5427, 8.5394, 8.499, 8.496, 8.4892, 8.4863, 7.9026, 7.8993, 7.8959, 7.8868, 7.8834, 7.88, 7.4711, 7.4611, 7.4553, 7.4455, 2.1378        | 15.01                      |
| Acetone         | yes                                 | 2.154                                                                                                                                                                                                                                                                                                                                                                                                                                                                                                                                                                                                                    | 2.1374                                                                                                                                    | 5.37                       |
| 1,3-Butadiene   | no, due to volatility at room temp. | 7.222, 7.207, 7.1922, 7.1564, 7.1399, 7.1386, 7.1188, 7.1045, 7.0905, 6.3934, 6.3913, 6.3773, 6.3631, 6.3587, 6.3449, 6.3401, 6.3263, 6.3124, 6.3102, 5.22, 5.2176, 5.2153, 5.2014, 5.1875, 5.185, 5.1829, 5.0923, 5.0755, 5.0725, 2.318, 2.1902, 2.1522                                                                                                                                                                                                                                                                                                                                                                 | 7.2, 7.1927, 7.1783, 7.1393, 7.1181, 7.1045, 7.0908, 6.3789-6.3219 cluster, 5.217, 5.1851 triplet, 5.0915 doublet, 5.0716 doublet, 2.3182 | NA                         |
| Acrolein        | yes                                 | 9.5535, 9.5392, 6.5638, 6.5613, 6.5425, 6.4271, 6.393, 6.386, 6.3725, 6.369, 6.3538, 6.3344, 6.3193                                                                                                                                                                                                                                                                                                                                                                                                                                                                                                                      | 9.5358, 9.5218, 6.546, 6.5432, 6.5418, 6.5279, 6.5244, 6.379, 6.3773, 6.3748, 6.368, 6.3545, 6.3503, 6.336                                | 5.19                       |
| Toluene         | yes                                 | 7.2246, 7.2096, 7.1948, 7.1563, 7.1414, 7.1217, 7.1071, 2.3211                                                                                                                                                                                                                                                                                                                                                                                                                                                                                                                                                           | 7.2081, 7.193, 7.1781, 7.1395, 7.1246, 7.1058, 7.0906, 7.0764, 2.3042                                                                     | 8.52                       |
| Catechol        | yes                                 | 6.752, 6.7449, 6.7403, 6.7332, 6.6542, 6.6471, 6.6424, 6.6353                                                                                                                                                                                                                                                                                                                                                                                                                                                                                                                                                            | 6.7368, 6.7297, 6.7251, 6.7179, 6.6387, 6.6316, 6.6269, 6.6198                                                                            | 10.19                      |
| Hydroquinone    | yes                                 | 6.6081                                                                                                                                                                                                                                                                                                                                                                                                                                                                                                                                                                                                                   | 6.5934                                                                                                                                    | 10.19                      |
| Formaldehyde    | yes                                 | 4.6422                                                                                                                                                                                                                                                                                                                                                                                                                                                                                                                                                                                                                   | 4.6277                                                                                                                                    | 2.78                       |
| Acrylonitrile   | yes                                 | 6.2798, 6.2781, 6.2442, 6.2424, 6.1527, 6.151, 6.1291, 6.1274, 5.8843, 5.8607, 5.8486, 5.8251                                                                                                                                                                                                                                                                                                                                                                                                                                                                                                                            | 6.264, 6.2622, 6.2283, 6.2265, 6.1369, 6.1352, 6.1134, 6.1117, 5.8682, 5.8446, 5.8324                                                     | 4.91                       |
| Propionaldehyde | yes                                 | 4.4162, 4.4052, 4.3942, 1.5861, 1.571,                                                                                                                                                                                                                                                                                                                                                                                                                                                                                                                                                                                   | 4.4018, 4.391, 4.3796,                                                                                                                    | 5.37                       |

|                                |                              |  |                                                                                                                                                                     |  |                                                                                                                                                                                                                                                                                                         |       |                                                                                                                                                                                                                                                                                                         |    |
|--------------------------------|------------------------------|--|---------------------------------------------------------------------------------------------------------------------------------------------------------------------|--|---------------------------------------------------------------------------------------------------------------------------------------------------------------------------------------------------------------------------------------------------------------------------------------------------------|-------|---------------------------------------------------------------------------------------------------------------------------------------------------------------------------------------------------------------------------------------------------------------------------------------------------------|----|
|                                |                              |  | 1.5532, 1.5419, 1.5268, 0.9232, 0.9082, 0.9086, 0.8939, 0.8791<br>0.8932                                                                                            |  |                                                                                                                                                                                                                                                                                                         |       |                                                                                                                                                                                                                                                                                                         |    |
| Crotonaldehyde                 | yes                          |  | 9.4549, 9.4389, 7.0446, 7.0307, 7.0132, 6.9994, 2.0353, 2.032, 2.0216, 2.0184                                                                                       |  | 9.4396, 9.4237                                                                                                                                                                                                                                                                                          | 6.48  |                                                                                                                                                                                                                                                                                                         |    |
| Butyraldehyde                  | no, obscured by other peaks  |  | 0.9515, 0.9373, 0.9231, 0.9085.                                                                                                                                     |  | Peak overlap, no isolated peaks found                                                                                                                                                                                                                                                                   | NA    |                                                                                                                                                                                                                                                                                                         |    |
| Butanone (methyl ethyl ketone) | yes                          |  | 2.5166, 2.502, 2.4873, 2.4726, 2.1241, 1.0245, 1.0098, 0.9952                                                                                                       |  | 2.5019, 2.4872, 2.4726, 2.4582, 2.1094, 1.0099, 0.9952, 0.9804                                                                                                                                                                                                                                          | 6.69  |                                                                                                                                                                                                                                                                                                         |    |
| Benzene                        | yes                          |  | 7.3267                                                                                                                                                              |  | 7.3117                                                                                                                                                                                                                                                                                                  | 7.22  |                                                                                                                                                                                                                                                                                                         |    |
| Pyridine                       | close to detection limit     |  | 8.5359, 7.8517, 7.4497, 7.4379, 7.4344, 7.4227, 7.3273                                                                                                              |  | 7.836, 7.4339, 7.4228, 7.4195, 7.4079,                                                                                                                                                                                                                                                                  | 7.32  |                                                                                                                                                                                                                                                                                                         |    |
| Phenol                         | close to detection limit     |  | 7.3266, 7.1651, 7.1501, 7.1331, 6.800, 6.7851, 6.7641, 6.7621, 6.7468                                                                                               |  | 8.0682, 7.1498, 7.1183, 6.7699, 6.7481, 6.7318                                                                                                                                                                                                                                                          | 8.70  |                                                                                                                                                                                                                                                                                                         |    |
| Styrene                        | close to detection limit     |  | 7.4181, 7.4031, 7.3263, 7.3159, 7.3013, 7.2952, 7.2857, 7.2397, 7.2248, 7.2104, 6.7539, 6.7317, 6.7176, 6.696, 5.7792, 5.7773, 5.744, 5.7418, 5.2189, 5.197, 4.5879 |  | 8.0683, 7.4041, 7.389, 7.2876, 5.7649, 5.729, 4.5732                                                                                                                                                                                                                                                    | 9.63  |                                                                                                                                                                                                                                                                                                         |    |
| <i>o</i> -Cresol methylphenol) | (2- at absolute LOD          |  | 7.032, 7.0177, 6.9779, 6.9591, 6.9463, 6.7148, 6.7006, 6.6908, 6.6773, 2.1623                                                                                       |  | 6.6915, 6.6764                                                                                                                                                                                                                                                                                          | 10.00 |                                                                                                                                                                                                                                                                                                         |    |
| <i>m</i> -Cresol methylphenol) | (3- at absolute LOD          |  | 7.0362, 7.0199, 7.0049, 6.6245, 6.6098, 6.5905, 6.5559, 6.5392                                                                                                      |  | 7.022, 6.9937                                                                                                                                                                                                                                                                                           | 10.00 |                                                                                                                                                                                                                                                                                                         |    |
| <i>p</i> -Cresol methylphenol) | (4- close to detection limit |  | 6.9657, 6.9495, 6.656, 6.6391, 2.2138                                                                                                                               |  | 6.9507, 6.9341, 6.6414, 6.6248                                                                                                                                                                                                                                                                          | 10.00 |                                                                                                                                                                                                                                                                                                         |    |
| Resorcinol                     | no                           |  |                                                                                                                                                                     |  |                                                                                                                                                                                                                                                                                                         | NA    |                                                                                                                                                                                                                                                                                                         |    |
| Quinoline                      | no                           |  |                                                                                                                                                                     |  |                                                                                                                                                                                                                                                                                                         | NA    |                                                                                                                                                                                                                                                                                                         |    |
| <i>N</i> -Nitrosornicotine     | no                           |  | Below detection limits. NMR overspike data acquired but no peaks observed at this concentration                                                                     |  |                                                                                                                                                                                                                                                                                                         | NA    |                                                                                                                                                                                                                                                                                                         |    |
| 1-Aminonaphthalene             | no                           |  |                                                                                                                                                                     |  |                                                                                                                                                                                                                                                                                                         | NA    |                                                                                                                                                                                                                                                                                                         |    |
| 2-Aminonaphthalene             | no                           |  |                                                                                                                                                                     |  |                                                                                                                                                                                                                                                                                                         | NA    |                                                                                                                                                                                                                                                                                                         |    |
| 3-Aminobiphenyl                | no                           |  |                                                                                                                                                                     |  |                                                                                                                                                                                                                                                                                                         | NA    |                                                                                                                                                                                                                                                                                                         |    |
|                                |                              |  |                                                                                                                                                                     |  | 8.48163 doublet, 8.47187 doublet, 8.44795 doublet, 8.43777 doublet, 8.3869 doublet, 7.80676 2 quintets, 7.69872 2 quintets, 7.4302 quartet, 7.3946 quartet, 6.4804, 4.7379, 4.7321, 4.7215, 4.6969, 4.6738, 4.2638, 4.2268, 3.564, 3.5589, 3.554, 3.523, 3.5178, 3.5131, 2.9955, 2.9888, 2.9843, 2.9809 |       | 8.48163 doublet, 8.47187 doublet, 8.44795 doublet, 8.43777 doublet, 8.3869 doublet, 7.80676 2 quintets, 7.69872 2 quintets, 7.4302 quartet, 7.3946 quartet, 6.4804, 4.7379, 4.7321, 4.7215, 4.6969, 4.6738, 4.2638, 4.2268, 3.564, 3.5589, 3.554, 3.523, 3.5178, 3.5131, 2.9955, 2.9888, 2.9843, 2.9809 | NA |

|                           |    |                                                                                                                                                                                                                                                                                                                                                                                                                                               |    |
|---------------------------|----|-----------------------------------------------------------------------------------------------------------------------------------------------------------------------------------------------------------------------------------------------------------------------------------------------------------------------------------------------------------------------------------------------------------------------------------------------|----|
| N-Nitrosoanabasine        | no | 8.5032, 8.4943, 8.4522, 8.4435, 8.2819, 8.4907, 8.4813                                                                                                                                                                                                                                                                                                                                                                                        | NA |
|                           |    | 7.8179, 7.8018, 7.5876, 7.5716, 7.4897, doublet, 8.4352                                                                                                                                                                                                                                                                                                                                                                                       |    |
| N-Nitrosornicotine ketone | no | 7.4801, 7.4739, 7.464, 7.4397, 7.4299, doublet, 8.2672                                                                                                                                                                                                                                                                                                                                                                                        | NA |
|                           |    | 7.4238, 7.4141, 6.2916, 5.7977, 5.7873, doublet, 7.7976                                                                                                                                                                                                                                                                                                                                                                                       |    |
| Benzo(a)pyrene            | no | 5.7769, 4.2616, 4.2509, 4.2404, 4.2338, doublet of quintets, 7.5671 doublet of quintets, 7.4517, 3.748, 3.7303, 3.7222, 2.5423, 2.5344, 2.5149, 2.5049, 2.4947, 2.4508, 2.4232, 7.4276, 7.4177, 7.411, 2.1856, 2.1762, 2.1667, 2.1579, 2.1485, 7.4016, 5.7755, 4.2382, 2.1388, 2.1299, 2.1204, 1.9797, 1.9565, triplet, 4.2105 triplet, 1.8173, 1.812, 1.8079, 1.8035, 1.7952, 1.7847, 3.7659 doublet, 3.7397 doublet, 3.7136 doublet, 3.3993 | NA |
|                           |    | 9.0958, 9.0926, 9.082, 9.0789, 8.7322, 9.0816 doublet, 8.7289, 8.7224, 8.7191, 8.3747, 8.3708, 9.0682 doublet, 8.7176 doublet, 8.7077 doublet, 8.3579                                                                                                                                                                                                                                                                                         |    |
| 4-Aminobiphenyl           | no | 7.5737, 7.5676, 7.5577, 4.2742, 4.2602, triplet, 8.3415 triplet, 4.2462, 3.7935, 3.7637, 3.7494, 3.1065, 7.5571 quartet, 4.2474 triplet, 3.7805, 3.7364 triplet, 3.1389, 3.1259, 2.2019, 2.1881, 2.1743, 2.151, 1.9729, 1.9587, triplet, 3.0936, 3.0135 triplet, 1.9446, 2.1887 triplet, 1.9316                                                                                                                                               | NA |
|                           |    | 9.153, 9.1347, 9.1177, 8.5763, 8.3849, 9.12 triplet, 8.36 doublet, 8.3195, 8.3667, 8.3352, 8.3191, 8.2792, 8.2636, 8.2549 doublet, 8.1289, 8.1143, 8.0554, 8.0372, 8.0117, 8.0986, 8.0397, 7.9965, 7.9813, 7.9672, 7.9489, 7.8645, 8.0219, 7.9963, 7.9814, 7.8618, 7.851, 7.8481, 7.8449, 7.8342, 7.9665, 7.9512, 7.9335, 7.8314, 7.8048, 7.8026, 7.7888, 7.7865, 7.833 triplet, 7.7733 triplet, 7.7752, 7.773, 2.152                         |    |
| 4-Aminobiphenyl           | no | 7.5142, 7.5118, 7.4974, 7.4953, 7.3818, 7.3765, 7.3724, 7.3634, 7.3594, 7.5005 triplet, 7.3656 triplet, 7.3485, 7.3336, 7.3541, 7.3453, 7.3291, 7.2209, 7.2186, 7.3179, 6.7815 triplet, 7.2061, 7.1914, 6.7979, 6.7925, 6.7884, 6.7644 triplet, 6.7795, 6.7754                                                                                                                                                                                | NA |
|                           |    |                                                                                                                                                                                                                                                                                                                                                                                                                                               |    |

<sup>1</sup> Calculated from the nicotine standard and projected to S/N 3:1.

**Supplementary Table S3.** Summary of NMR validation data<sup>a</sup>.

| Compound                    | <sup>3</sup> R4F<br>1 <sup>st</sup> replicate           | <sup>3</sup> R4F<br>2nd replicate                       | <sup>3</sup> R4F<br>3rd replicate                       | <sup>3</sup> R4F<br>4 <sup>th</sup> replicate           | <sup>3</sup> R4F<br>5 <sup>th</sup> replicate           | CM6                 |
|-----------------------------|---------------------------------------------------------|---------------------------------------------------------|---------------------------------------------------------|---------------------------------------------------------|---------------------------------------------------------|---------------------|
| Acetaldehyde                | Yes                                                     | Yes                                                     | yes                                                     | yes                                                     | yes                                                     | yes                 |
| Isoprene                    | yes                                                     | Yes                                                     | yes                                                     | yes                                                     | yes                                                     | yes                 |
| Nicotine                    | yes                                                     | Yes                                                     | yes                                                     | yes                                                     | yes                                                     | yes                 |
| Acetone                     | yes                                                     | Yes                                                     | yes                                                     | yes                                                     | yes                                                     | yes                 |
| 1,3-Butadiene               | no (volatile at RT)                                     | no (volatile at RT) |
| Acrolein                    | yes                                                     | Yes                                                     | yes                                                     | yes                                                     | yes                                                     | yes                 |
| Toluene                     | yes                                                     | Yes                                                     | yes                                                     | yes                                                     | yes                                                     | yes                 |
| Catechol                    | yes                                                     | yes                                                     | yes                                                     | yes                                                     | yes                                                     | yes                 |
| Hydroquinone                | yes                                                     | yes                                                     | yes                                                     | yes                                                     | yes                                                     | yes                 |
| Formaldehyde                | yes<br>(partially overlapped by multiplet) <sup>a</sup> | yes                 |
| Acrylonitrile               | yes                                                     | yes                                                     | yes                                                     | yes                                                     | yes                                                     | yes                 |
| Propionaldehyde             | yes                                                     | yes                                                     | yes                                                     | yes                                                     | yes                                                     | yes                 |
| Crotonaldehyde              | yes                                                     | yes                                                     | yes                                                     | yes                                                     | yes                                                     | yes                 |
| Butyraldehyde               | yes                                                     | yes                                                     | yes                                                     | yes                                                     | yes                                                     | yes                 |
| Butanone                    | yes                                                     | yes                                                     | yes                                                     | yes                                                     | yes                                                     | yes                 |
| Benzene                     | yes                                                     | yes                                                     | yes                                                     | yes                                                     | yes                                                     | yes                 |
| Pyridine                    | Close to LOD                                            | Close to LOD        |
| Phenol                      | yes                                                     | Yes                                                     | yes                                                     | yes                                                     | yes                                                     | yes                 |
| Styrene                     | close to LOD (some peaks not detected)                  | yes (weak)          |
| <i>o</i> -Cresol            | close to LOD                                            | yes (weak)          |
| <i>m</i> -Cresol            | no                                                      | no                                                      | no                                                      | no                                                      | no                                                      | no                  |
| <i>p</i> -Cresol            | close to LOD                                            | close to LOD        |
| Resorcinol                  | no                                                      | no                                                      | no                                                      | no                                                      | no                                                      | no                  |
| Quinoline                   | no                                                      | no                                                      | no                                                      | no                                                      | no                                                      | no                  |
| <i>N</i> -Nitrosornicotine  | no                                                      | no                                                      | no                                                      | no                                                      | no                                                      | no                  |
| 1-Aminonaphthalene          | no                                                      | no                                                      | no                                                      | no                                                      | no                                                      | no                  |
| 2-Aminonaphthalene          | no                                                      | no                                                      | no                                                      | no                                                      | no                                                      | no                  |
| 3-Aminobiphenyl             | no                                                      | no                                                      | no                                                      | no                                                      | no                                                      | no                  |
| <i>N</i> -Nitrosoanatabine  | no                                                      | no                                                      | no                                                      | no                                                      | no                                                      | no                  |
| <i>N</i> -Nitrosoanabasine  | no                                                      | no                                                      | no                                                      | no                                                      | no                                                      | no                  |
| <i>N</i> -Nitrosornicotine- | no                                                      | no                                                      | no                                                      | no                                                      | no                                                      | no                  |

| Compound        | <sup>3</sup> R <sub>4</sub> F<br>1 <sup>st</sup> replicate | <sup>3</sup> R <sub>4</sub> F<br>2nd replicate | <sup>3</sup> R <sub>4</sub> F<br>3rd<br>replicate | <sup>3</sup> R <sub>4</sub> F<br>4 <sup>th</sup> replicate | <sup>3</sup> R <sub>4</sub> F<br>5 <sup>th</sup> replicate | CM6 |
|-----------------|------------------------------------------------------------|------------------------------------------------|---------------------------------------------------|------------------------------------------------------------|------------------------------------------------------------|-----|
| ketone          |                                                            |                                                |                                                   |                                                            |                                                            |     |
| Benzopyrene     | no                                                         | no                                             | no                                                | no                                                         | no                                                         | no  |
| 4-Aminobiphenil | no                                                         | no                                             | no                                                | no                                                         | no                                                         | no  |

<sup>a</sup>“Yes” - detected; “no” - not detected. The first replicate of <sup>3</sup>R<sub>4</sub>F was lost during NMR sample preparation.



**Supplementary Table S4.** NMR peaks for compounds detected in the TSC of the sample ISO 3R4F.

| Compound     | NMR detectable in TSC | Peaks observable in TSC, ppm <sup>a</sup> |               |               |               |               |               |
|--------------|-----------------------|-------------------------------------------|---------------|---------------|---------------|---------------|---------------|
|              |                       | Ref                                       | 1st replicate | 2nd replicate | 3rd replicate | 4th replicate | 5th replicate |
| Acetaldehyde | yes                   | (4.6826)                                  | 4.6830        | 4.6831        | 4.6828        | 4.6830        | 4.6833        |
|              |                       | (4.6723)                                  | 4.6728        | 4.6728        | 4.6726        | 4.6726        | 4.6730        |
|              |                       | (4.6620)                                  | 4.6623        | 4.6625        | 4.6623        | 4.6625        | 4.6627        |
|              |                       | (4.6517)                                  | 4.6519        | 4.6521        | 4.65195       | 4.65195       | 4.6525        |
|              |                       | (1.2528)                                  | 1.2530        | 1.2530        | 1.2528        | 1.2530        | 1.2532        |
|              |                       | (1.2424)                                  | 1.2426        | 1.24265       | 1.2425        | 1.24265       | 1.2428        |
| Isoprene     | yes                   | (6.4669)                                  | 6.4668        | 6.4668        | 6.4668        | 6.4668        | 6.4670        |
|              |                       | (6.4455)                                  | 6.4454        | 6.4454        | 6.4454        | 6.4455        | 6.4456        |
|              |                       | (6.4319)                                  | 6.4318        | 6.4318        | 6.4318        | 6.4318        | 6.4320        |
|              |                       | (6.4107)                                  | 6.4104        | 6.4106        | 6.4106        | 6.4104        | 6.4108        |
|              |                       | (5.1858)                                  | 5.1857        | 5.1857        | 5.1857        | 5.1857        | 5.1860        |
|              |                       | (5.1509)                                  | 5.1508        | 5.1508        | 5.1508        | 5.1508        | 5.1511        |
|              |                       | (5.0473)                                  | 5.0475        | 5.0475        | 5.0475        | 5.0475        | 5.0475        |
|              |                       | (5.0260)                                  | 5.0260        | 5.0260        | 5.0260        | 5.0260        | 5.0260        |
|              |                       | (4.9759)                                  | 4.9759        | 4.9759        | 4.9759        | 4.9759        | 4.9759        |
|              |                       | (4.9527)                                  | 4.9529        | 4.9529        | 4.9529        | 4.9529        | 4.9529        |
|              |                       | (4.9515)                                  | 4.9520        | 4.9520        | 4.9520        | 4.9520        | 4.9520        |
|              |                       | (4.9480)                                  | 4.9480        | 4.9480        | 4.9480        | 4.9480        | 4.9481        |
| (4.9463)     | 4.9463                | 4.9463                                    | 4.9463        | 4.9463        | 4.9463        |               |               |
| Nicotine     | yes                   | (8.5430)                                  | 8.5723        | 8.5691        | 8.5815        | 8.5815        | 8.5657        |
|              |                       | (8.5394)                                  | 8.5679        | 8.5653        | 8.5724        | 8.5724        | 8.5620        |
|              |                       | (8.4990)                                  | 8.5341        | 8.5300        | 8.54505       | 8.54505       | 8.5261        |
|              |                       | (8.496)                                   | 8.5311        | 8.5270        | 8.5421        | 8.5421        | 8.5233        |
|              |                       | (8.4892)                                  | 8.5243        | 8.5203        | 8.53515       | 8.5356        | 8.5164        |
|              |                       | (8.4863)                                  | 8.5214        | 8.5174        | 8.5325        | 8.5326        | 8.5134        |
|              |                       | (7.9026)                                  | 7.9263        | 7.9246        | 7.9340        | 7.9346        | 7.9226        |
|              |                       | (7.8993)                                  | 7.9264        | 7.92455       | 7.9304        | 7.9311        | 7.9194        |
|              |                       | (7.8959)                                  | 7.9189        | 7.9174        | 7.9267        | 7.9273        | 7.91575       |
|              |                       | (7.8868)                                  | 7.9105        | 7.910895      | 7.9182        | 7.9186        | 7.9071        |

| Compound      | NMR detectable in TSC | Peaks observable in TSC, ppm <sup>a</sup> |               |               |               |               |               |
|---------------|-----------------------|-------------------------------------------|---------------|---------------|---------------|---------------|---------------|
|               |                       | Ref                                       | 1st replicate | 2nd replicate | 3rd replicate | 4th replicate | 5th replicate |
|               |                       | (7.8834)                                  | 7.90685       | 7.9051        | 7.9146        | 7.9151        | 7.9035        |
|               |                       | (7.8800)                                  | 7.9030        | 7.9015        | 7.9108        | 7.9115        | 7.8997        |
|               |                       | (7.4711)                                  | 7.4947        | 7.4922        | 7.5025        | 7.5025        | 7.4898        |
|               |                       | (7.4611)                                  | 7.4849        | 7.4822        | 7.49265       | 7.4930        | 7.4792        |
|               |                       | (7.4553)                                  | 7.479         | 7.4777        | 7.4868        | 7.4868        | 7.4773        |
|               |                       | (7.4455)                                  | 7.4692        | 7.4665        | 7.4743        | 7.4748        | 7.4641        |
|               |                       | (2.1967)                                  | 2.1967        | 2.1968        | 2.1967        | 2.1967        | 2.1967        |
| Acetone       | yes                   | (2.1374)                                  | 2.1376        | 2.1376        | 2.1376        | 2.1376        | 2.138076      |
| 1,3 Butadiene | no                    | (7.2081)                                  | 7.2081        | 7.2081        | 7.2081        | 7.2081        | 7.2081        |
|               |                       | (7.1927)                                  | 7.1931        | 7.1931        | 7.1931        | 7.1931        | 7.1933        |
|               |                       | (7.1783)                                  | 7.1782        | 7.1782        | 7.1782        | 7.1782        | 7.1785        |
|               |                       | (7.1393)                                  | 7.1393        | 7.1393        | 7.1393        | 7.1393        | 7.1397        |
|               |                       | (7.1181)                                  | 7.1245        | 7.1245        | 7.1245        | 7.1245        | 7.1245        |
|               |                       | (7.1045)                                  | 7.1068        | 7.1068        | 7.1068        | 7.1068        | 7.1068        |
|               |                       | (7.0906)                                  | 7.0906        | 7.0906        | 7.0906        | 7.0906        | 7.0906        |
|               |                       | (6.338)                                   | 6.338         | 6.338         | 6.338         | 6.338         | 6.338         |
|               |                       | (5.2036)                                  | 5.2036        | 5.2036        | 5.2036        | 5.2036        | 5.2036        |
|               |                       | (5.217)                                   | 5.217         | 5.217         | 5.217         | 5.217         | 5.217         |
|               |                       | (5.1851)                                  | 5.1858        | 5.1858        | 5.1858        | 5.1858        | 5.1860        |
|               |                       | (5.0915)                                  | 5.0915        | 5.0915        | 5.0915        | 5.0915        | 5.0915        |
|               |                       | (5.0716)                                  | 5.078         | 5.078         | 5.078         | 5.078         | 5.078         |
|               |                       | (2.3182)                                  | 2.3042        | 2.3042        | 2.3042        | 2.3042        | 2.3042        |
| Acrolein      | yes                   | (9.5358)                                  | 9.5354        | 9.5354        | 9.5358        | 9.5358        | 9.5354        |
|               |                       | (9.5218)                                  | 9.5215        | 9.5215        | 9.5215        | 9.5215        | 9.5215        |
|               |                       | (6.5460)                                  | 6.5463        | 6.5466        | 6.5463        | 6.5466        | 6.5470        |
|               |                       | (6.5432)                                  | 6.5437        | 6.5437        | 6.5435        | 6.5437        | 6.5441        |
|               |                       | (6.5418)                                  | 6.5422        | 6.5422        | 6.5422        | 6.5425        | 6.5430        |
|               |                       | (6.5279)                                  | 6.5285        | 6.5285        | 6.5283        | 6.5285        | 6.5289        |
|               |                       | (6.5244)                                  | 6.5247        | 6.5247        | 6.5247        | 6.5250        | 6.5254        |
|               |                       | (6.3790)                                  | 6.3796        | 6.3796        | 6.3794        | 6.3795        | 6.3797        |
|               |                       | (6.3773)                                  | 6.3776        | 6.3778        | 6.3776        | 6.3779        | 6.3782        |
|               |                       | (6.3748)                                  | 6.37495       | 6.3751        | 6.37495       | 6.3751        | 6.37545       |
|               |                       | (6.3680)                                  | 6.3683        | 6.3683        | 6.3683        | 6.3683        | 6.3686        |
|               |                       | (6.3545)                                  | 6.3549        | 6.3549        | 6.3549        | 6.3549        | 6.3552        |
|               |                       | (6.3503)                                  | 6.3506        | 6.3506        | 6.3506        | 6.3506        | 6.3509        |

| Compound      | NMR detectable in TSC | Peaks observable in TSC, ppm <sup>a</sup> |                                              |                                              |                                              |                                              |                                              |
|---------------|-----------------------|-------------------------------------------|----------------------------------------------|----------------------------------------------|----------------------------------------------|----------------------------------------------|----------------------------------------------|
|               |                       | Ref                                       | 1st replicate                                | 2nd replicate                                | 3rd replicate                                | 4th replicate                                | 5th replicate                                |
|               |                       | (6.3360)                                  | 6.3360                                       | 6.3360                                       | 6.3360                                       | 6.3360                                       | 6.33655                                      |
| Toluene       | yes                   | (7.2081)                                  | 7.2081                                       | 7.2081                                       | 7.2081                                       | 7.2081                                       | 7.2084                                       |
|               |                       | (7.1930)                                  | 7.1930                                       | 7.1930                                       | 7.1930                                       | 7.1930                                       | 7.1934                                       |
|               |                       | (7.1781)                                  | 7.1781                                       | 7.1781                                       | 7.1781                                       | 7.1781                                       | 7.1784                                       |
|               |                       | (7.1395)                                  | 7.1395                                       | 7.1395                                       | 7.1395                                       | 7.1395                                       | 7.1395                                       |
|               |                       | (7.1246)                                  | 7.1247                                       | 7.1247                                       | 7.1247                                       | 7.1247                                       | 7.1247                                       |
|               |                       | (7.1058)                                  | 7.1063                                       | 7.1063                                       | 7.1063                                       | 7.1063                                       | 7.1063                                       |
|               |                       | (7.0906)                                  | 7.0906                                       | 7.0908                                       | 7.0906                                       | 7.0906                                       | 7.0908                                       |
|               |                       | (7.0764)                                  | 7.0764                                       | 7.0764                                       | 7.0764                                       | 7.0764                                       | 7.0764                                       |
|               |                       | (2.3042)                                  | 2.3042                                       | 2.3042                                       | 2.3042                                       | 2.3042                                       | 2.3042                                       |
| Catechol      | yes                   | (6.7368)                                  | 6.7372                                       | 6.7372                                       | 6.7372                                       | 6.7372                                       | 6.7376                                       |
|               |                       | (6.7297)                                  | 6.7301                                       | 6.7301                                       | 6.7301                                       | 6.7301                                       | 6.7306                                       |
|               |                       | (6.7251)                                  | 6.7255                                       | 6.7255                                       | 6.7255                                       | 6.7255                                       | 6.7258                                       |
|               |                       | (6.7179)                                  | 6.7182                                       | 6.7182                                       | 6.7182                                       | 6.7182                                       | 6.7187                                       |
|               |                       | (6.6387)                                  | 6.6389                                       | 6.6389                                       | 6.6389                                       | 6.6392                                       | 6.6394                                       |
|               |                       | (6.6316)                                  | 6.6319                                       | 6.6319                                       | 6.6317                                       | 6.6319                                       | 6.6321                                       |
|               |                       | (6.6269)                                  | 6.6272                                       | 6.6273                                       | 6.6272                                       | 6.6272                                       | 6.6275                                       |
|               |                       | (6.6198)                                  | 6.6198                                       | 6.6201                                       | 6.6198                                       | 6.6198                                       | 6.6204                                       |
|               |                       | ;                                         |                                              |                                              |                                              |                                              |                                              |
| Hydroquinone  | yes                   | (6.5934)                                  | 6.5939                                       | 6.5939                                       | 6.5939                                       | 6.5939                                       | 6.5942                                       |
|               |                       | );                                        |                                              |                                              |                                              |                                              |                                              |
| Formaldehyde  | yes                   | (4.6277)                                  | 4.6277 (partially overlapped by a multiplet) |
| Acrylonitrile | yes                   | (6.2640)                                  | 6.2641                                       | 6.2641                                       | 6.2641                                       | 6.2641                                       | 6.2647                                       |
|               |                       | (6.2622)                                  | 6.2622                                       | 6.2624                                       | 6.2622                                       | 6.2625                                       | 6.2629                                       |
|               |                       | (6.2283)                                  | 6.2285                                       | 6.2285                                       | 6.2285                                       | 6.2285                                       | 6.2289                                       |
|               |                       | (6.2265)                                  | 6.2266                                       | 6.2266                                       | 6.2266                                       | 6.2266                                       | 6.2270                                       |
|               |                       | (6.1369)                                  | 6.1373                                       | 6.1371                                       | 6.1371                                       | 6.1371                                       | 6.1373                                       |
|               |                       | (6.1352)                                  | 6.1355                                       | 6.1355                                       | 6.1355                                       | 6.1355                                       | 6.1361                                       |
|               |                       | (6.1134)                                  | 6.1136                                       | 6.1136                                       | 6.1136                                       | 6.1136                                       | 6.1142                                       |
|               |                       | (6.1117)                                  | 6.1118                                       | 6.1118                                       | 6.1118                                       | 6.1118                                       | 6.1125                                       |
|               |                       | (5.8682)                                  | 5.8682                                       | 5.8682                                       | 5.8682                                       | 5.8682                                       | 5.8684                                       |
|               |                       | (5.8446)                                  | 5.8445                                       | 5.8445                                       | 5.8445                                       | 5.8445                                       | 5.8448                                       |

| Compound        | NMR detectable in TSC | Peaks observable in TSC, ppm <sup>a</sup> |               |               |               |               |               |
|-----------------|-----------------------|-------------------------------------------|---------------|---------------|---------------|---------------|---------------|
|                 |                       | Ref                                       | 1st replicate | 2nd replicate | 3rd replicate | 4th replicate | 5th replicate |
|                 |                       | (5.8324)                                  | 5.83245       | 5.83245       | 5.83245       | 5.83245       | 5.83245       |
| Propionaldehyde | yes                   | (4.4018)                                  | 4.40215       | 4.40215       | 4.40215       | 4.40215       | 4.4024        |
|                 |                       | (4.3910)                                  | 4.39135       | 4.39135       | 4.39135       | 4.39135       | 4.39171       |
|                 |                       | (4.3796)                                  | 4.3797        | 4.3800        | 4.37965       | 4.3800        | 4.3804        |
|                 |                       | (0.9086)                                  | 0.9085        | 0.9085        | 0.9085        | 0.9085        | 0.9085        |
|                 |                       | (0.8939)                                  | 0.8938        | 0.8938        | 0.8938        | 0.8938        | 0.8940        |
|                 |                       | (0.8791)                                  | 0.8790        | 0.8790        | 0.8790        | 0.8790        | 0.8792        |
| Crotonaldehyde  | yes                   | (9.4396)                                  | 9.4395        | 9.4395        | 9.4395        | 9.4395        | 9.4397        |
|                 |                       | (9.4237)                                  | 9.4235        | 9.4235        | 9.4235        | 9.4235        | 9.4237        |
| Butyraldehyde   | no                    | not detected                              | not detected  | not detected  | not detected  | not detected  | not detected  |
| Butanone        | yes                   | (2.5019)                                  | 2.5022        | 2.5022        | 2.5018        | 2.5022        | 2.5023        |
|                 |                       | (2.4872)                                  | 2.4874        | 2.4874        | 2.4872        | 2.4874        | 2.4876        |
|                 |                       | (2.4726)                                  | 2.4728        | 2.4728        | 2.4728        | 2.4728        | 2.4730        |
|                 |                       | (2.4582)                                  | 2.4585        | 2.4587        | 2.4582        | 2.4582        | 2.4588        |
|                 |                       | (2.1094)                                  | 2.1094        | 2.1096        | 2.1094        | 2.1096        | 2.1099        |
|                 |                       | (1.0099)                                  | 1.0098        | 1.0098        | 1.0098        | 1.0098        | 1.0101        |
|                 |                       | (0.9952)                                  | 0.9950        | 0.9950        | 0.9950        | 0.9950        | 0.9954        |
|                 |                       | (0.9804)                                  | 0.9802        | 0.9802        | 0.9802        | 0.9802        | 0.9802        |
| Benzene         | yes                   | (7.3117)                                  | 7.31175       | 7.31175       | 7.3116        | 7.31175       | 7.31120       |
| Pyridine        | close to LOD          | (7.8360)                                  | 7.8370        | 7.8370        | 7.8370        | 7.8370        | 7.8370        |
|                 |                       | (7.4339)                                  | 7.4380        | 7.4380        | 7.4410        | 7.4410        | 7.4380        |
|                 |                       | (7.4228)                                  | 7.4227        | 7.4227        | 7.4227        | 7.4227        | 7.4227        |
|                 |                       | (7.4195)                                  | 7.4193        | 7.4193        | 7.4193        | 7.4193        | 7.4193        |
|                 |                       | (7.4079)                                  | 7.4074        | 7.4074        | 7.4074        | 7.4074        | 7.4074        |
| Phenol          | yes                   | (8.0682)                                  | 8.0686        | 8.0690        | 8.0688        | 8.0690        | 8.0692        |
|                 |                       | (7.1498)                                  | 7.1504        | 7.1504        | 7.1504        | 7.1504        | 7.1504        |
|                 |                       | (7.1183)                                  | 7.1184        | 7.1184        | 7.1184        | 7.1184        | 7.1189        |
|                 |                       | (6.7699)                                  | 6.7701        | 6.7701        | 6.7701        | 6.7701        | 6.7701        |
|                 |                       | (6.7481)                                  | 6.74805       | 6.74805       | 6.74805       | 6.74805       | 6.7479        |
|                 |                       | (6.7318)                                  | 6.7318        | 6.7318        | 6.7318        | 6.7318        | 6.7318        |
| Styrene         | close to LOD          | (8.0683)                                  | 8.06855       | 8.0689        | 8.0689        | 8.0689        | 8.0689        |
|                 |                       | (7.4041)                                  | 7.4038        | 7.4038        | 7.4026        | 7.4026        | 7.4038        |
|                 |                       | (7.3890)                                  | 7.3880        | 7.3880        | 7.3880        | 7.3880        | 7.3890        |

| Compound                          | NMR detectable in TSC | Peaks observable in TSC, ppm <sup>a</sup> |               |               |               |               |               |
|-----------------------------------|-----------------------|-------------------------------------------|---------------|---------------|---------------|---------------|---------------|
|                                   |                       | Ref                                       | 1st replicate | 2nd replicate | 3rd replicate | 4th replicate | 5th replicate |
|                                   |                       | )<br>(7.2876)                             | 7.2868        | 7.2868        | 7.2868        | 7.2868        | 7.2871        |
|                                   |                       | (5.7649)                                  | -             | -             | -             | -             | -             |
|                                   |                       | (5.7294)                                  | -             | -             | -             | -             | -             |
|                                   |                       | (4.5732)                                  | 4.5732        | 4.5732        | 4.5732        | 4.5732        | 4.5732        |
| <i>o</i> -Cresol                  | close to LOD          | (6.6915)                                  | -             | -             | -             | -             | -             |
|                                   |                       | (6.6859)                                  | 6.6858        | 6.6858        | 6.6858        | 6.6858        | 6.6859        |
| <i>m</i> -Cresol                  | no                    | -                                         | -             | -             | -             | -             | -             |
| <i>p</i> -Cresol                  | close to LOD          | (6.9507)                                  | 6.9507        | 6.9508        | 6.9508        | 6.9510        | 6.9511        |
|                                   |                       | (6.9341)                                  | 6.9340        | 6.9340        | 6.9340        | 6.9340        | 6.9340        |
|                                   |                       | (6.6414)                                  | 6.6415        | 6.6415        | 6.6415        | 6.6415        | 6.6415        |
|                                   |                       | (6.6248)                                  | 6.6240        | 6.6240        | 6.6240        | 6.6240        | 6.6248        |
| Resorcinol                        | no                    | -                                         | -             | -             | -             | -             | -             |
| Quinoline                         | no                    | -                                         | -             | -             | -             | -             | -             |
| <i>N</i> -Nitrosornicotine        | no                    | -                                         | -             | -             | -             | -             | -             |
| 1-Aminonaphthalene                | no                    | -                                         | -             | -             | -             | -             | -             |
| 2-Aminonaphthalene                | no                    | -                                         | -             | -             | -             | -             | -             |
| 3-Aminobiphenyl                   | no                    | -                                         | -             | -             | -             | -             | -             |
| <i>N</i> -Nitrosoanatabine        | no                    | -                                         | -             | -             | -             | -             | -             |
| <i>N</i> -Nitrosoanabasine        | no                    | -                                         | -             | -             | -             | -             | -             |
| <i>N</i> -Nitrosornicotine-ketone | no                    | -                                         | -             | -             | -             | -             | -             |
| Benzo(a)pyrene                    | no                    | -                                         | -             | -             | -             | -             | -             |

<sup>a</sup> Each column shows the resonances peaks detected for each compound. The first replicate was lost during NMR sample preparation.

**Supplementary Table S5.** NMR peaks for compounds detected in the CM6 tobacco smoke condensate.

| Compound name | NMR detectable in TSC | Peaks observed in TSC, ppm <sup>1</sup>                                                                                                                                                                                                                                                                                           |
|---------------|-----------------------|-----------------------------------------------------------------------------------------------------------------------------------------------------------------------------------------------------------------------------------------------------------------------------------------------------------------------------------|
| Acetaldehyde  | yes                   | 4.6836 (4.6826); 4.6733 (4.6723); 4.6630 (4.6620); 4.6526 (4.6517); 1.2535 (1.2528) 1.2432 (1.2424)                                                                                                                                                                                                                               |
| Isoprene      | yes                   | 6.4673 (6.4669); 6.4460 (6.4455) 6.4323 (6.4319); 6.4110 (6.4107); 5.1863 (5.1858); 5.1514 (5.1509); 5.0481 (5.0473); 5.0268 (5.026); 4.9764 (4.9759); 4.9534 (4.9527); (4.9515) not detected; (4.948) not detected; (4.9463) not detected                                                                                        |
| Nicotine      | yes                   | 8.5402 (8.543); 8.5363 (8.5394);<br>8.4954 (8.4990); 8.4922 (8.496); 8.4856 (8.4892); 8.4825 (8.4863);<br>7.9015 (7.9026); 7.8978 (7.8993);<br>7.8941 (7.8959); 7.8857 (7.8868);<br>7.8821 (7.8834); 7.8780 (7.8800);<br>7.4691 (7.4711); 7.4594 (7.4611);<br>7.4533 (7.4553); 7.4434 (7.4455);<br>2.1975 (previously unassigned) |
| Acetone       | yes                   | 2.1383 (previously unassigned)                                                                                                                                                                                                                                                                                                    |
| 1,3 Butadiene | Close to LOD          | 7.2 (7.2);<br>7.1938 (7.1927); 7.1789 (7.1783);<br>7.1401 (7.1393); 7.1194 (7.1181);<br>7.1082 (7.1045); 7.0912 (7.0908);<br>(6.3504) not detected<br>5.218 (5.217); 5.1857 (5.1851, center of triplet);<br>(5.0716) not detected;<br>(5.0915) not detected;<br>(2.3182) not detected                                             |
| Acrolein      | yes                   | 9.5363 (9.5358); 9.5224 (9.5218);<br>6.5470 (6.5460); 6.5444 (6.5432);<br>6.3802 (6.3790); 6.3782 (6.3773);<br>6.37615 (6.3748); 6.3689 (6.3680);<br>6.3554 (6.3545); 6.3511 (6.3503);<br>6.3368 (6.3360);                                                                                                                        |
| Toluene       | yes                   | 7.2086 (7.2081); 7.1937 (7.1930);<br>7.1788 (7.1781); 7.1395 (7.1395);<br>7.1252 (7.1246); 7.1071 (7.1058);<br>7.0910 (7.0906); 7.0772 (7.0764);<br>2.30495 (2.3042)                                                                                                                                                              |
| Catechol      | yes                   | 6.7377 (6.7368); 6.7306 (6.7297);<br>6.7258 (6.7251); 6.7189 (6.7179);<br>6.6396 (6.6387); 6.6325 (6.6316);<br>6.6278 (6.6269); 6.6207 (6.6198)                                                                                                                                                                                   |
| Hydroquinone  | yes                   | 6.59465 (6.5934)                                                                                                                                                                                                                                                                                                                  |
| Formaldehyde  | yes                   | 4.6282 (4.6277)                                                                                                                                                                                                                                                                                                                   |

| Compound name                     | NMR detectable in TSC | Peaks observed in TSC, ppm <sup>1</sup>                                                                                                                                                                  |
|-----------------------------------|-----------------------|----------------------------------------------------------------------------------------------------------------------------------------------------------------------------------------------------------|
| Acrylonitrile                     | yes                   | 6.2649 (6.2640); 6.2623 (6.2622);<br>6.2293 (6.2283); 6.2272 (6.2265);<br>6.1381 (6.1369); 6.1364 (6.1352),<br>6.1146 (6.1134); 6.1126 (6.1117);<br>5.8690 (5.8682); 5.8453 (5.8446);<br>5.8331 (5.8324) |
| Propionaldehyde                   | yes                   | 4.4027 (4.4018); 4.3918 (4.3910);<br>0.9090 (0.9086); 0.8945 (0.8939);<br>0.8797 (0.8791)                                                                                                                |
| Crotonaldehyde                    | yes                   | 9.4399 (9.4396); 9.4241 (9.4237)                                                                                                                                                                         |
| Butyraldehyde                     | no                    | -                                                                                                                                                                                                        |
| Butanone                          | yes                   | 2.5027 (2.5019); 2.4878 (2.4872);<br>2.4730 (2.4726); 2.4590 (2.4582);<br>2.1102 (2.1094); 1.010 (1.0099);<br>0.9957 (0.9952); 0.9809 (0.9804)                                                           |
| Benzene                           | yes                   | 7.3123 (7.3117)                                                                                                                                                                                          |
| Pyridine                          | yes                   | 7.8370 (7.8360);<br>All other peaks not detected                                                                                                                                                         |
| Phenol                            | yes                   | 8.0690 (8.0682); 7.1503 (7.1498);<br>7.1192 (7.1183); 6.7714 (6.7699);<br>6.7487 (6.7481); 6.73345 (6.7318)                                                                                              |
| Styrene                           | yes                   | 8.0683 (8.0683); 7.4076 (7.4041);<br>7.3687 (7.3890); 7.2872 (7.2876);<br>5.7668 (5.7649); 5.7303 (5.7290);<br>4.5733 (4.5732)                                                                           |
| <i>o</i> -Cresol                  | yes                   | 6.6920 (6.6915); 6.6870 (6.6859)                                                                                                                                                                         |
| <i>m</i> -Cresol                  | no                    | -                                                                                                                                                                                                        |
| <i>p</i> -Cresol                  | yes                   | 6.95165 (6.9507); 6.9343 (6.9341);<br>6.6422 (6.6414); 6.62485 (6.6248)                                                                                                                                  |
| Resorcinol                        | no                    | -                                                                                                                                                                                                        |
| Quinoline                         | no                    | -                                                                                                                                                                                                        |
| <i>N</i> -Nitrosornicotine        | no                    | -                                                                                                                                                                                                        |
| 1-Aminonaphtalene                 | no                    | -                                                                                                                                                                                                        |
| 2-Aminonaphtalene                 | no                    | -                                                                                                                                                                                                        |
| 3-Aminobiphenyl                   | no                    | -                                                                                                                                                                                                        |
| <i>N</i> -Nitrosoanatabine        | no                    | -                                                                                                                                                                                                        |
| <i>N</i> -Nitrosoanabasine        | no                    | -                                                                                                                                                                                                        |
| <i>N</i> -Nitrosornicotine-ketone | no                    | -                                                                                                                                                                                                        |
| Benzopyrene                       | no                    | -                                                                                                                                                                                                        |
| 4-Aminobiphenil                   | no                    | -                                                                                                                                                                                                        |

<sup>1</sup> For each detected peak, the corresponding resonance frequency of the database is reported in parentheses.

**Supplementary Figure S1.** Expanded  $^1\text{H}$  NMR spectrum of 3R4F smoke condensate (see also Figure 2).

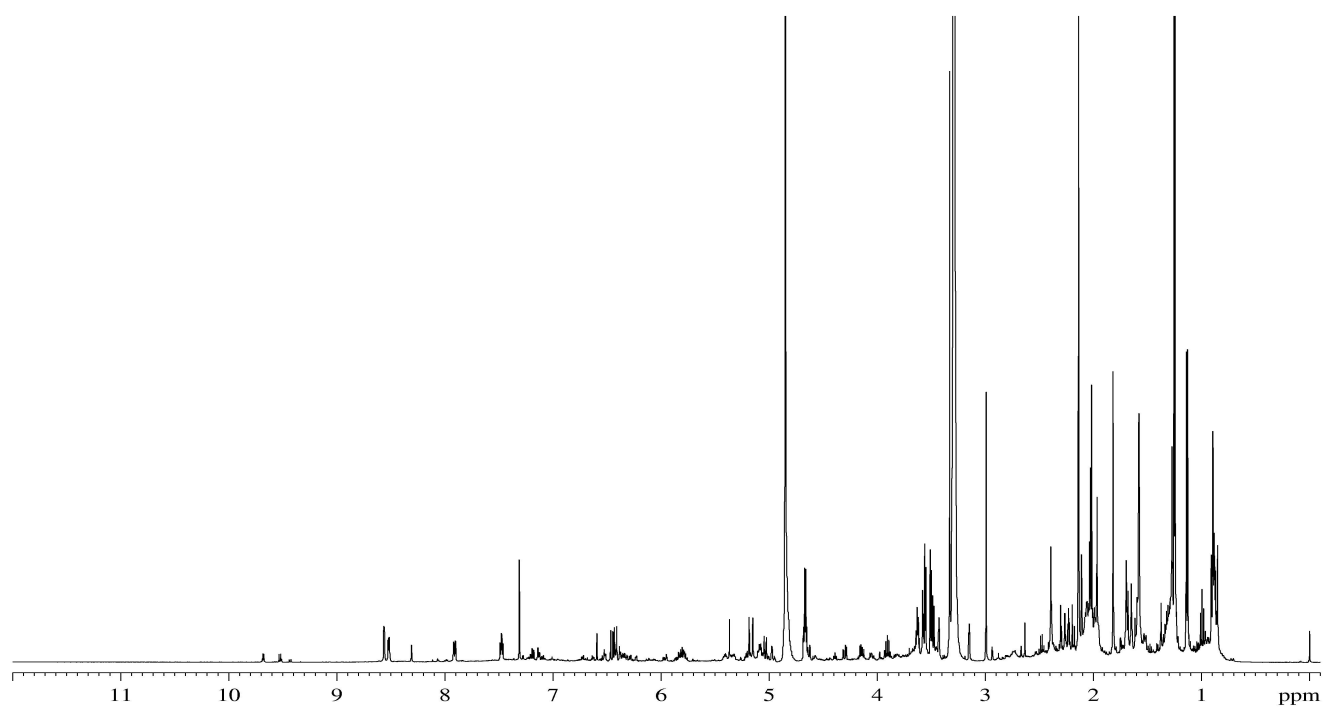



**Supplementary Table Figure S2.** Expanded stacked plot of the NMR spectra of five replicates of 3R4F smoke condensate, along with a plot of the relative standard deviation (see also Figure 3).

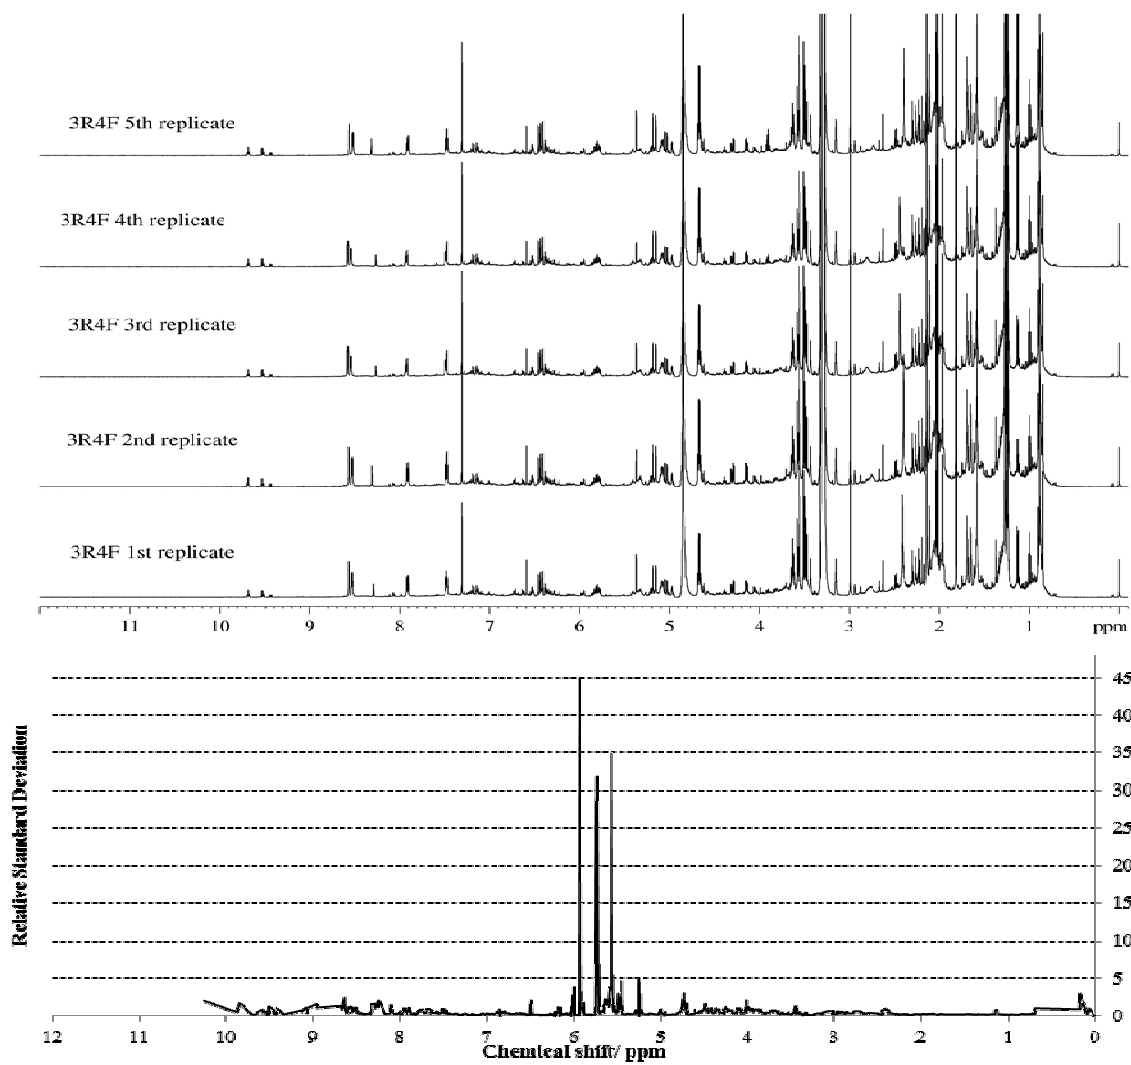

**Supplementary Figure S3.** Expanded stacked plot of the NMR spectra of 3R4F and CM6 smoke condensates. The NMR spectral profiles of these two samples showed a difference of 10% when peak areas were compared (see also Figure 4).

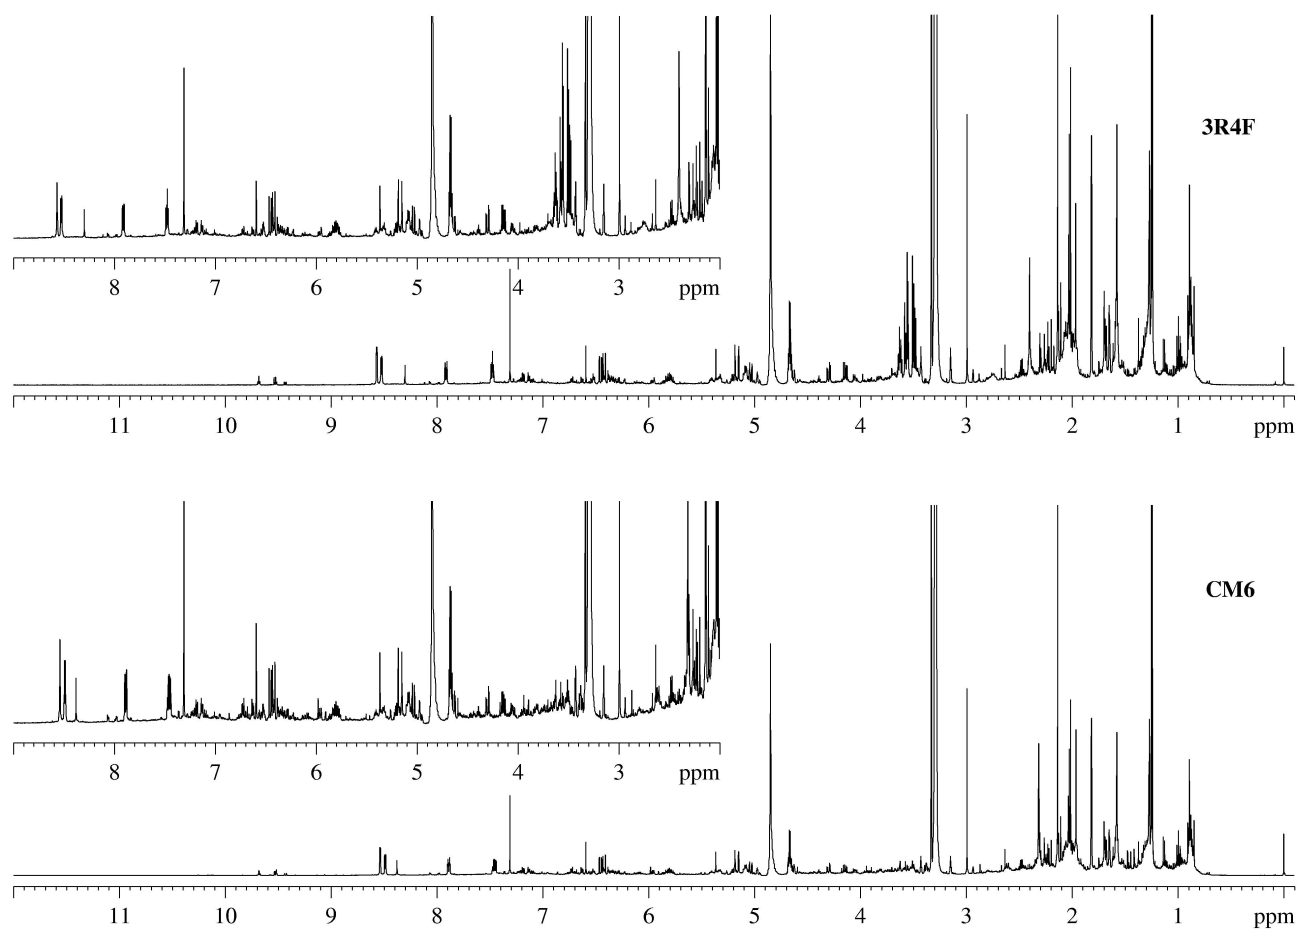

**Supplementary Table S6.** The relative recorded chemical shifts of HPHCs detected in different types of cigarette.

| Compound                                         | NMR detectability in TSC | Chemical shift in CD <sub>3</sub> OD | Type of cigarette smoke condensate |                               |                               |
|--------------------------------------------------|--------------------------|--------------------------------------|------------------------------------|-------------------------------|-------------------------------|
|                                                  |                          |                                      | CM6                                | 3R4F (from 10 cig)            | 3R4F (from 5 cig)             |
| Caffeic acid                                     | Detected                 | 6.7526                               | ?                                  | ?                             | ?                             |
|                                                  |                          | 6.76903                              | 6.7485                             | 6.7485                        | 6.7482                        |
|                                                  |                          | 6.9074 (doublet)                     | 6.9053 (doublet not resolved)      | 6.9053 (doublet not resolved) | 6.9053 (doublet not resolved) |
|                                                  |                          | 6.9113 (doublet)                     | 6.9053 (doublet not resolved)      | 6.9053 (doublet not resolved) | 6.9053 (doublet not resolved) |
|                                                  |                          | 6.9236 (doublet)                     | 6.9209 (doublet not resolved)      | 6.9209 (doublet not resolved) | 6.9209 (doublet not resolved) |
|                                                  |                          | 6.9277 (doublet)                     | 6.9209 (doublet not resolved)      | 6.9209 (doublet not resolved) | 6.9209 (doublet not resolved) |
|                                                  |                          | 7.017                                | 7.0125                             | 7.0125                        | 7.018                         |
|                                                  |                          | 7.0212                               | 7.0163                             | 7.0163                        | 7.0157                        |
|                                                  |                          | 7.4963                               | ?                                  | ?                             | ?                             |
|                                                  |                          | 7.5281                               | ?                                  | ?                             | ?                             |
| 4-(Nitroso-methylamino)-1-(3-pyridyl)-1-butanone | Detected                 | 1.9786                               | 1.992                              | 1.9908                        | 1.9913                        |
|                                                  |                          | 1.9925                               | 2.004                              | 2.004                         | 2.004                         |
|                                                  |                          | 2.1806                               | 2.1637                             | 2.1637                        | 2.1637                        |
|                                                  |                          | 2.1939                               | 2.1761                             | ?                             | ?                             |
|                                                  |                          | 2.2079                               | 2.1887                             | ?                             | 2.1881                        |
|                                                  |                          | 2.2217                               | 2.23064                            | 2.23064                       | 2.23064                       |
|                                                  |                          | 2.2351                               | 2.2447                             | 2.2447                        | 2.2447                        |
|                                                  |                          | 3.0175                               | 3.0154                             | 3.0143                        | 3.0151                        |
|                                                  |                          | 3.0307                               | -?                                 | 3.0295                        | 3.0307                        |
|                                                  |                          | 3.0448                               | -?                                 | ?                             | 3.0448                        |
|                                                  |                          | 3.1122                               | 3.1281                             | 3.1281                        | 3.1281                        |
|                                                  |                          | 3.1551                               | ?                                  | ?                             | ?                             |
|                                                  |                          | 3.1687                               | ?                                  | ?                             | ?                             |
|                                                  |                          | 3.1823                               | ?                                  | ?                             | ?                             |
|                                                  |                          | 3.7407                               | ?                                  | ?                             | ?                             |
|                                                  |                          | 3.7598                               | ?                                  | ?                             | ?                             |
|                                                  |                          | 3.7694                               | -?                                 | ?                             | ?                             |
|                                                  |                          | 3.7997                               | 3.7778                             | 3.7793                        | 3.7794                        |
|                                                  |                          | 4.2525                               | 4.2304                             | shoulder at 4.2305            | shoulder at 4.2301            |
| 4.2662                                           | shoulder at 4.2446       | at shoulder at 4.2446                | shoulder at 4.2446                 |                               |                               |

| Compound          | NMR detectability in TSC | Chemical shift in CD <sub>3</sub> OD | Type of cigarette smoke condensate |                    |                   |
|-------------------|--------------------------|--------------------------------------|------------------------------------|--------------------|-------------------|
|                   |                          |                                      | CM6                                | 3R4F (from 10 cig) | 3R4F (from 5 cig) |
|                   |                          | 4.2806                               | 4.259                              | 4.259              | 4.259             |
|                   |                          | 7.5629                               | ?                                  | ?                  | ?                 |
|                   |                          | 7.5642                               | ?                                  | ?                  | ?                 |
|                   |                          | 7.5726                               | ?                                  | 7.5552             | 7.5552            |
|                   |                          | 7.574                                | ?                                  | 7.5568             | 7.5563            |
|                   |                          | 7.5787                               | ?                                  | 7.5586             | 7.5589            |
|                   |                          | 7.5801                               | ?                                  | 7.5598             | 7.5589            |
|                   |                          | 7.5886                               | ?                                  | ?-                 | 7.5679            |
|                   |                          | 7.59                                 | ?                                  | ?                  | 7.5692            |
|                   |                          | 8.3462                               | ?                                  | obscured           | obscured          |
|                   |                          | 8.3502                               | ?                                  | obscured           | obscured          |
|                   |                          | 8.3564                               | ?-                                 | obscured           | obscured          |
|                   |                          | 8.3604                               | ?-                                 | obscured           | obscured          |
|                   |                          | 8.364                                | ?                                  | obscured           | obscured          |
|                   |                          | 8.376                                | ?                                  | 8.342              | ?                 |
|                   |                          | 8.3803                               | ?                                  | 8.346              | ?                 |
|                   |                          | 8.7252                               | ?                                  | ?                  | 8.6906            |
|                   |                          | 8.7289                               | ?                                  | ?                  | 8.693             |
|                   |                          | 8.7351                               | ?-                                 | ?                  | 8.7               |
|                   |                          | 8.7385                               | ?                                  | ?                  | 8.7029            |
|                   |                          | 9.0846                               | ?                                  | ?                  | ?                 |
|                   |                          | 9.0895                               | ?                                  | 9.0638             | 9.0632            |
|                   |                          | 9.09844                              | 9.06736                            | 9.0674             | 9.0705            |
|                   |                          | 9.1028                               | 9.06527                            | 9.0744             | 9.0715            |
| Acetamide         | Detected                 | 1.9305                               | 1.9182                             | 1.9181             | 1.9177            |
| 5-Methyl chrysene | Detected                 | 7.5987                               | ?                                  | 7.5992             | ?                 |
|                   |                          | 7.6132                               | ?                                  | ?                  | ?                 |
|                   |                          | 7.6448                               | ?                                  | ?                  | ?                 |
|                   |                          | 7.661                                | ?                                  | 7.6318             | ?                 |
|                   |                          | 7.6746                               | ?                                  | 7.6539             | ?                 |
|                   |                          | 7.9048                               | ?                                  | 7.8901             | ?                 |
|                   |                          | 7.9184                               | ?                                  | 7.9039             | ?                 |
|                   |                          | 7.9355                               | ?                                  | 7.9201             | ?                 |
|                   |                          | 8.019                                | ?                                  | 8.0042             | ?                 |
|                   |                          | 8.0369                               | ?                                  | 8.0241             | ?                 |
|                   |                          | 8.0463                               | ?                                  | ?                  | ?                 |
| Chrysene          | Detected                 | 7.6299                               | ?                                  | ?                  | ?                 |
|                   |                          | 7.6324                               | ?                                  | ?                  | ?                 |
|                   |                          | 7.646                                | ?                                  | ?                  | ?                 |
|                   |                          | 7.6598                               | ?                                  | 7.65975            | ?                 |
|                   |                          | 7.66                                 | ?                                  | ?                  | ?                 |

| Compound            | NMR detectability in TSC | Chemical shift in CD <sub>3</sub> OD | Type of cigarette smoke condensate |                    |                   |
|---------------------|--------------------------|--------------------------------------|------------------------------------|--------------------|-------------------|
|                     |                          |                                      | CM6                                | 3R4F (from 10 cig) | 3R4F (from 5 cig) |
|                     |                          | 7.6624                               | ?                                  | 7.6621             | ?                 |
|                     |                          | 7.7064                               | ?                                  | 7.7064             | ?                 |
|                     |                          | 7.7091                               | ?                                  | 7.7094             | ?                 |
|                     |                          | 7.72026                              | ?                                  | 7.7202             | ?                 |
|                     |                          | 7.72303                              | ?                                  | 7.7234             | ?                 |
|                     |                          | 7.7258                               | ?                                  | 7.7261             | ?                 |
|                     |                          | 7.73705                              | ?                                  | 7.7372             | ?                 |
|                     |                          | 7.73966                              | ?                                  | 7.7396             | ?                 |
|                     |                          | 8.016                                | ?                                  | ?                  | ?                 |
|                     |                          | 8.0319                               | ?                                  | ?                  | ?                 |
|                     |                          | 8.0439                               | ?                                  | 8.044              | ?                 |
|                     |                          | 8.0621                               | ?                                  | 8.0622             | ?                 |
|                     |                          | 8.798                                | -?                                 | ?                  | ?                 |
|                     |                          | 8.816                                | -?                                 | ?                  | ?                 |
|                     |                          | 8.854                                | -?                                 | ?                  | ?                 |
|                     |                          | 8.8706                               | -?                                 | ?                  | ?                 |
| <i>o</i> -Anisidine | Detected                 | 3.8351                               | 3.8192                             | 3.8192             | 3.8192            |
|                     |                          | 6.6721                               | ?                                  | ?                  | ?                 |
|                     |                          | 6.6761                               | 6.672                              | 6.672              | 6.672             |
|                     |                          | 6.6867                               | ?                                  | ?                  | ?                 |
|                     |                          | 6.6906                               | ?                                  | ?                  | ?                 |
|                     |                          | 6.7016                               | 6.6916                             | 6.6916             | shoulder          |
|                     |                          | 6.7059                               | 6.6956                             | 6.6956             |                   |
|                     |                          | 6.7095                               | obscured                           | obscured           | obscured          |
|                     |                          | 6.7128                               | obscured                           | obscured           | obscured          |
|                     |                          | 6.7247                               | ?                                  | ?                  | ?                 |
|                     |                          | 6.72766                              | ?                                  | ?                  | ?                 |
|                     |                          | 6.73906                              | obscured                           | obscured           | obscured          |
|                     |                          | 6.74202                              | obscured                           | obscured           | obscured          |
|                     |                          | 6.7457                               | 6.733                              | 6.733              | 6.728 (shoulder)  |
|                     |                          | 6.7498                               | obscured                           | obscured           | obscured          |
|                     |                          | 6.76072                              | ?                                  | ?                  | ?                 |
|                     |                          | 6.76481                              | obscured                           | obscured           | obscured          |
|                     |                          | 6.81596                              | ?                                  | ?                  | 6.8058            |
|                     |                          | 6.8191                               | ?                                  | ?                  | 6.8086            |
|                     |                          | 6.8316                               | ?                                  | ?                  | 6.8203            |
|                     |                          | 6.8344                               | ?                                  | ?                  | 6.8231            |
| Pyrrolidine         | Detected                 | 1.6918                               | obscured                           | obscured           | obscured          |
|                     |                          | 1.7055                               | obscured                           | obscured           | obscured          |
|                     |                          | 1.7129                               | 1.9853                             | 1.9853             | 1.9853            |
|                     |                          | 1.7192                               | 1.9894                             | 1.9894             | 1.9894            |
|                     |                          | 1.7252                               | 1.9978                             | obscured           | obscured          |

| Compound                             | NMR detectability in TSC | Chemical shift in CD <sub>3</sub> OD | Type of cigarette smoke condensate |                              |                              |
|--------------------------------------|--------------------------|--------------------------------------|------------------------------------|------------------------------|------------------------------|
|                                      |                          |                                      | CM6                                | 3R4F (from 10 cig)           | 3R4F (from 5 cig)            |
|                                      |                          | 1.7327                               | obscured                           | obscured                     | obscured                     |
|                                      |                          | 1.7465                               | ?                                  | ?                            | ?                            |
|                                      |                          | 2.7957                               | 3.2079                             | 3.2076                       | 3.2076                       |
|                                      |                          | 2.8085                               | 3.2221                             | 3.2203                       | 3.2214                       |
| Ethyl benzene                        | Detected                 | 1.2029                               | 1.186                              | 1.186                        | 1.186                        |
|                                      |                          | 1.2083                               | 1.2011                             | 1.2011                       | 1.2011                       |
|                                      |                          | 1.2352                               | obscured                           | obscured                     | obscured                     |
|                                      |                          | 2.6043                               | 2.5866                             | 2.58676                      | 2.5865                       |
|                                      |                          | 2.6206                               | 2.6015                             | 2.6015                       | 2.6015                       |
|                                      |                          | 2.635                                | shoulder of peak at 2.6201         | 2.6171                       | 2.6171                       |
|                                      |                          | 2.6509                               | obscured                           | obscured                     | obscured                     |
|                                      |                          | 3.3106                               | obscured                           | obscured                     | obscured                     |
|                                      |                          | 7.1165                               | 7.1514                             | 7.1509                       | 7.1509                       |
|                                      |                          | 7.1306                               | 7.165                              | 7.165                        | 7.165                        |
|                                      |                          | 7.1439                               | 7.168                              | 7.168                        | 7.168                        |
|                                      |                          | 7.1709                               | obscured                           | obscured                     | obscured                     |
|                                      |                          | 7.1514                               | obscured                           | obscured                     | obscured                     |
|                                      |                          | 7.2428                               | obscured                           | obscured                     | obscured                     |
|                                      |                          | 7.2577                               | 7.226                              | 7.2234                       | 7.226                        |
| <i>o</i> -Toluidine                  | Detected                 | 2.141                                | ?                                  | ?                            | ?                            |
|                                      |                          | 6.60398 (doublet)                    | obscured                           | obscured                     | obscured                     |
|                                      |                          | 6.6062 (doublet)                     | obscured                           | obscured                     | obscured                     |
|                                      |                          | 6.619 (doublet)                      | 6.612 (doublet not resolved)       | 6.612 (doublet not resolved) | 6.612 (doublet not resolved) |
|                                      |                          | 6.62094 (doublet)                    | 6.612 (doublet not resolved)       | 6.612 (doublet not resolved) | 6.612 (doublet not resolved) |
|                                      |                          | 6.63355 (doublet)                    | 6.6247                             | 6.6247                       | 6.6247                       |
|                                      |                          | 6.6357 (doublet)                     | obscured                           | obscured                     | obscured                     |
|                                      |                          | 6.6971 (doublet)                     | 6.692 (doublet)                    | 6.692 (doublet)              | 6.692 (doublet)              |
|                                      |                          | 6.713 (doublet)                      | 6.7066 (doublet)                   | 6.7066 (doublet)             | 6.7066 (doublet)             |
|                                      |                          | 6.9289                               | -?                                 | -?                           | -?                           |
|                                      |                          | 6.9444                               | 6.9336                             | 6.9336                       | 6.9336                       |
|                                      |                          | 6.9626                               | 6.9559                             | 6.9559                       | 6.9559                       |
|                                      |                          | 6.9786                               | 6.9713                             | 6.9713                       | 6.9713                       |
| <i>N</i> -Nitroso-methyl ethyl amine | Detected                 | 1.0598                               | ?                                  | ?                            | ?                            |
|                                      |                          | 1.0742                               | ?                                  | ?                            | ?                            |
|                                      |                          | 1.0888                               | ?                                  | ?                            | ?                            |
|                                      |                          | 1.3432                               | ?                                  | ?                            | ?                            |
|                                      |                          | 1.3576                               | ?                                  | ?                            | ?                            |
|                                      |                          | 1.3721                               | ?                                  | ?                            | ?                            |

| Compound                    | NMR detectability in TSC | Chemical shift in CD <sub>3</sub> OD | Type of cigarette smoke condensate |                    |                    |
|-----------------------------|--------------------------|--------------------------------------|------------------------------------|--------------------|--------------------|
|                             |                          |                                      | CM6                                | 3R4F (from 10 cig) | 3R4F (from 5 cig)  |
|                             |                          | 3.05847                              | ?                                  | ?                  | ?                  |
|                             |                          | 3.6263                               | obscured                           | obscured           | obscured           |
|                             |                          | 3.6408                               | obscured                           | obscured           | obscured           |
|                             |                          | 3.6553                               | obscured                           | obscured           | obscured           |
|                             |                          | 3.67                                 | obscured                           | obscured           | obscured           |
|                             |                          | 3.734                                | ?                                  | ?                  | 3.662              |
|                             |                          | 4.1583                               | obscured                           | obscured           | obscured           |
|                             |                          | 4.168                                | 4.168                              | 4.168              | 4.168              |
|                             |                          | 4.1823                               | ?                                  | ?                  | ?                  |
|                             |                          | 4.20194                              | ?                                  | ?                  | 4.1776             |
| <i>N</i> -Nitrosomorpholine | Detected                 | 3.6279                               | 3.6216                             | 3.6214             | 3.6205             |
|                             |                          | 3.6382                               | 3.6322                             | 3.6319             | 3.6314             |
|                             |                          | 3.6489                               | 3.6422                             | 3.6422             | 3.6422             |
|                             |                          | 4.2478                               | shoulder                           | shoulder           | shoulder           |
|                             |                          | 4.2596                               | 4.2596                             | 4.2596             | 4.2572             |
|                             |                          | 4.2698                               | shoulder                           | shoulder           | shoulder           |
|                             |                          | 4.2798                               | ?                                  | ?                  | ?                  |
| Anabasine                   | Detected                 | 1.555                                | ?                                  | ?                  | ?                  |
|                             |                          | 1.562                                | ?                                  | ?                  | ?                  |
|                             |                          | 1.58                                 | ?                                  | ?                  | ?                  |
|                             |                          | 1.582                                | ?                                  | ?                  | ?                  |
|                             |                          | 1.5969                               | ?                                  | ?                  | ?                  |
|                             |                          | 1.601                                | ?                                  | ?                  | ?                  |
|                             |                          | 1.6216                               | ?                                  | ?                  | ?                  |
|                             |                          | 1.6272                               | ?                                  | ?                  | ?                  |
|                             |                          | 1.6842                               | ?                                  | ?                  | ?                  |
|                             |                          | 1.6894                               | ?                                  | shoulder at 1.9361 | shoulder at 1.9554 |
|                             |                          | 1.6946                               | ?                                  | ?                  | ?                  |
|                             |                          | 1.6995                               | ?                                  | ?                  | ?                  |
|                             |                          | 1.705                                | ?                                  | ?                  | ?                  |
|                             |                          | 1.7082                               | ?                                  | ?                  | ?                  |
|                             |                          | 1.71243                              | ?                                  | ?                  | ?                  |
|                             |                          | 1.8177                               | 2.0505                             | 2.0505             | 2.0505             |
|                             |                          | 1.8218                               | ?                                  | ?                  | ?                  |
|                             |                          | 1.8281                               | ?                                  | ?                  | ?                  |
|                             |                          | 1.8383                               | 2.0717                             | 2.0732             | 2.0714             |
|                             |                          | 1.8468                               | ?                                  | ?                  | ?                  |
|                             |                          | 1.9275                               | ?                                  | ?                  | ?                  |
|                             |                          | 2.7722                               | ?                                  | ?                  | ?                  |
|                             |                          | 2.7776                               | 2.7755                             | 2.7755             | 2.7752             |

| Compound       | NMR detectability in TSC | Chemical shift in CD <sub>3</sub> OD | Type of cigarette smoke condensate |                            |                            |
|----------------|--------------------------|--------------------------------------|------------------------------------|----------------------------|----------------------------|
|                |                          |                                      | CM6                                | 3R4F (from 10 cig)         | 3R4F (from 5 cig)          |
|                |                          | 2.7961                               | ?                                  | ?                          | ?                          |
|                |                          | 2.8017                               | ?                                  | ?                          | ?                          |
|                |                          | 2.8198                               | ?                                  | ?                          | ?                          |
|                |                          | 2.8254                               | ?                                  | ?                          | ?                          |
|                |                          | 3.1469                               | ?                                  | 3.1717                     | 3.1719                     |
|                |                          | 3.14695                              | ?                                  | ?                          | ?                          |
|                |                          | 3.1677                               | obscured by peak at 3.1877         | obscured by peak at 3.1877 | obscured by peak at 3.1877 |
|                |                          | 3.1712                               | ?                                  | ?                          | ?                          |
|                |                          | 3.1757                               | ?                                  | ?                          | ?                          |
|                |                          | 3.6894                               | ?                                  | ?                          | ?                          |
|                |                          | 3.6949                               | obscured by peak at 3.4684         | obscured by peak at 3.4686 | obscured by peak at 3.4687 |
|                |                          | 3.7114                               | obscured by peak at 3.4879         | obscured by peak at 3.4879 | obscured by peak at 3.4879 |
|                |                          | 3.7158                               | obscured by peak at 3.4879         | obscured by peak at 3.4879 | obscured by peak at 3.4879 |
|                |                          | 7.4023 (center of doublet)           | ?                                  | 7.5264                     | 7.5264                     |
|                |                          | 7.4126 (center of a doublet)         | ?                                  | 7.53715                    | 7.5359                     |
|                |                          | 7.4188 (center of a doublet)         | ?                                  | 7.54475                    | 7.5436                     |
|                |                          | 7.4286 (center of a doublet)         | ?                                  | shoulder                   | shoulder                   |
|                |                          | 7.85401 (double triplet)             | ?                                  | ?                          | ?                          |
|                |                          | 7.85742 (double triplet)             | ?                                  | ?                          | ?                          |
|                |                          | 7.86112 (double triplet)             | ?                                  | ?                          | ?                          |
|                |                          | 7.86974 (double triplet)             | ?                                  | ?                          | ?                          |
|                |                          | 7.87333 (double triplet)             | ?                                  | ?                          | ?                          |
|                |                          | 7.87685 (double triplet)             | ?                                  | ?                          | ?                          |
|                |                          | 8.4235                               | ?                                  | 8.691                      | 8.691                      |
|                |                          | 8.4266                               | ?                                  | 8.693                      | 8.693                      |
|                |                          | 8.4332                               | ?                                  | 8.7                        | 8.699                      |
|                |                          | 8.4364                               | ?                                  | 8.7035                     | 8.7033                     |
|                |                          | 8.5458                               | ?                                  | 8.7372                     | 8.7345                     |
|                |                          | 8.5499                               | ?                                  | 8.7419                     | 8.7394                     |
| 2,3 Benzofuran | Detected                 | 6.82382                              | ?                                  | 6.80552                    | obscured                   |
|                |                          | 6.8256                               | ?                                  | 6.80552                    | obscured                   |
|                |                          | 6.82805                              | ?                                  | 6.8088                     | obscured                   |
|                |                          | 6.8299                               | ?                                  | 6.8088                     | obscured                   |
|                |                          | 7.1995                               | obscured                           | obscured                   | obscured                   |
|                |                          | 7.2012                               | obscured                           | obscured                   | obscured                   |
|                |                          | 7.2144                               | obscured                           | obscured                   | obscured                   |
|                |                          | 7.2157                               | obscured                           | obscured                   | obscured                   |



| Compound | NMR detectability in TSC | Chemical shift in CD <sub>3</sub> OD | Type of cigarette smoke condensate |                    |                   |
|----------|--------------------------|--------------------------------------|------------------------------------|--------------------|-------------------|
|          |                          |                                      | CM6                                | 3R4F (from 10 cig) | 3R4F (from 5 cig) |
|          |                          | 7.2291                               | obscured                           | obscured           | obscured          |
|          |                          | 7.2311                               | obscured                           | obscured           | obscured          |
|          |                          | 7.2622                               | 7.2423                             | 7.2423             | 7.2423            |
|          |                          | 7.2647                               | 7.2441                             | 7.2441             | 7.2441            |
|          |                          | 7.2788                               | ?                                  | ?                  | ?                 |
|          |                          | 7.2809                               | ?                                  | ?                  | ?                 |
|          |                          | 7.29304                              | obscured                           | obscured           | obscured          |
|          |                          | 7.29546                              | obscured                           | obscured           | obscured          |
|          |                          | 7.47199                              | obscured                           | obscured           | obscured          |
|          |                          | 7.4733                               | obscured                           | obscured           | obscured          |
|          |                          | 7.48839                              | obscured                           | obscured           | obscured          |
|          |                          | 7.48977                              | obscured                           | obscured           | obscured          |
|          |                          | 7.59619                              | 7.5762                             | 7.5762             | 7.576             |
|          |                          | 7.61153                              | Obscured                           | obscured           | obscured          |
|          |                          | 7.7265                               | ?                                  | ?                  | ?                 |
|          |                          | 7.73089                              | ?                                  | ?                  | ?                 |
